# Supplementary material for: Integrative Transcriptomic and Metabolomic Analysis at Organ Scale Reveals Gene Modules Involved in the Responses to Suboptimal Nitrogen Supply in Tomato
Source: MDPI journal article supplement (doi:10.3390/agronomy11071320), 2021-06-29
Supplement: s1 [file s1]

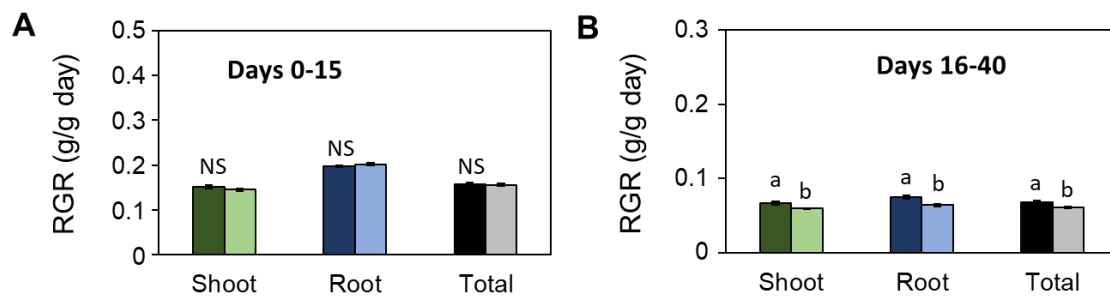

Figure S1. Effects of nitrogen supply levels on relative growth rate (RGR) in tomato. RGR values of the plant, shoots and roots were calculated based on dry matter accumulation at two periods: days 0 to 15 (A), and 16 to 40 (B) in plants grown under optimal (8 mM N; dark coloured bars) and sub-optimal (4 mM N; light coloured bars) for 40 days. For each determination, different letters indicate significant differences ( $P < 0.05$ ).
