# Supplementary material for: Integrative Transcriptomic and Metabolomic Analysis at Organ Scale Reveals Gene Modules Involved in the Responses to Suboptimal Nitrogen Supply in Tomato
Source: MDPI journal article supplement (doi:10.3390/agronomy11071320), 2021-06-29
Supplement: s1 [file s1]

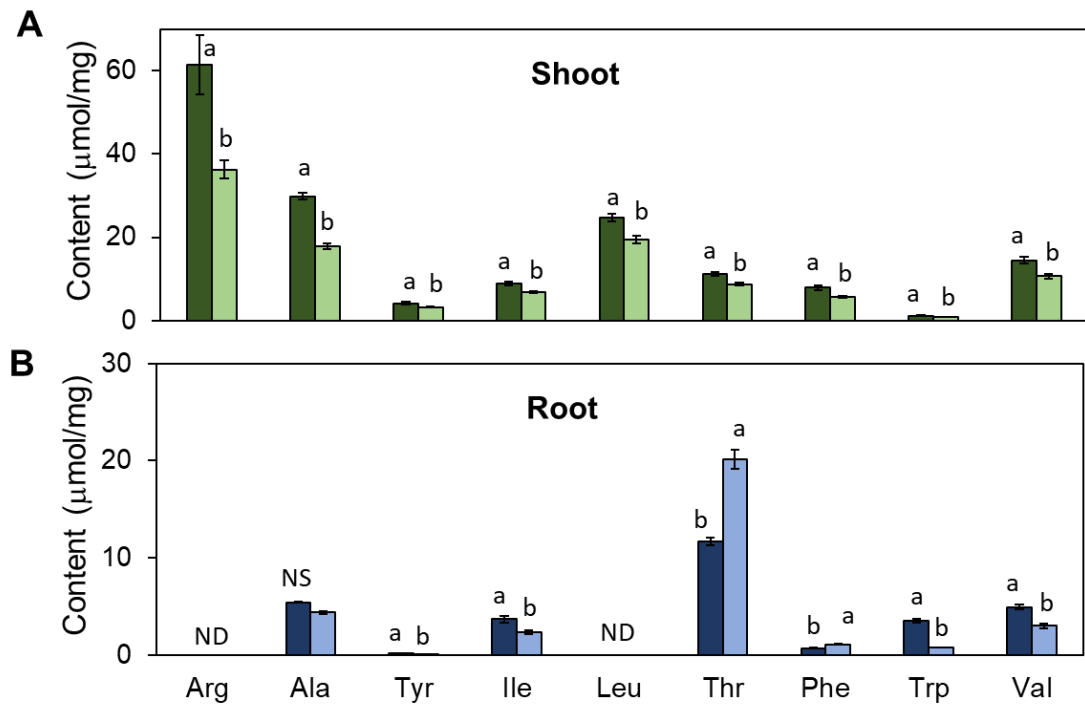

**Figure S3.** Effect of nitrogen supply levels on amino acids contents in leaves (A) and roots (B) of plants grown at 8 mM N (dark colored bars) and 4 mM N (light colored bars) for 20 days. For each metabolite, different letters indicate significant differences ( $P < 0.05$ ).
