# Supplementary material for: Integrative Transcriptomic and Metabolomic Analysis at Organ Scale Reveals Gene Modules Involved in the Responses to Suboptimal Nitrogen Supply in Tomato
Source: MDPI journal article supplement (doi:10.3390/agronomy11071320), 2021-06-29
Supplement: s1 [file s1]

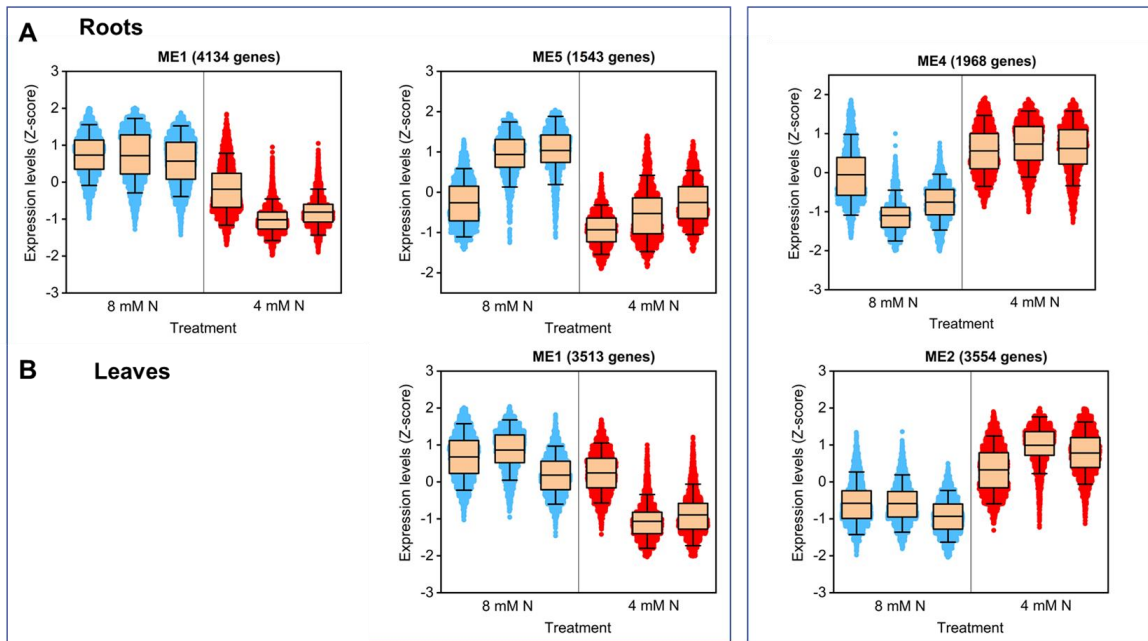

**Figure S5.** Gene co-expression clusters of roots (A) and leaves (B) under nitrogen limitation conditions (4 mM N). In each box, the central mark indicates the median, and the bottom and top edges of the box indicate the 25th and 75th percentiles, respectively. Whisker indicates standard deviation of the expression data of all genes belongs to the cluster. Plants grown under 8 mM N were used as controls.
