# Supplementary material for: Integrative Transcriptomic and Metabolomic Analysis at Organ Scale Reveals Gene Modules Involved in the Responses to Suboptimal Nitrogen Supply in Tomato
Source: MDPI journal article supplement (doi:10.3390/agronomy11071320), 2021-06-29
Supplement: s1 [file s1]

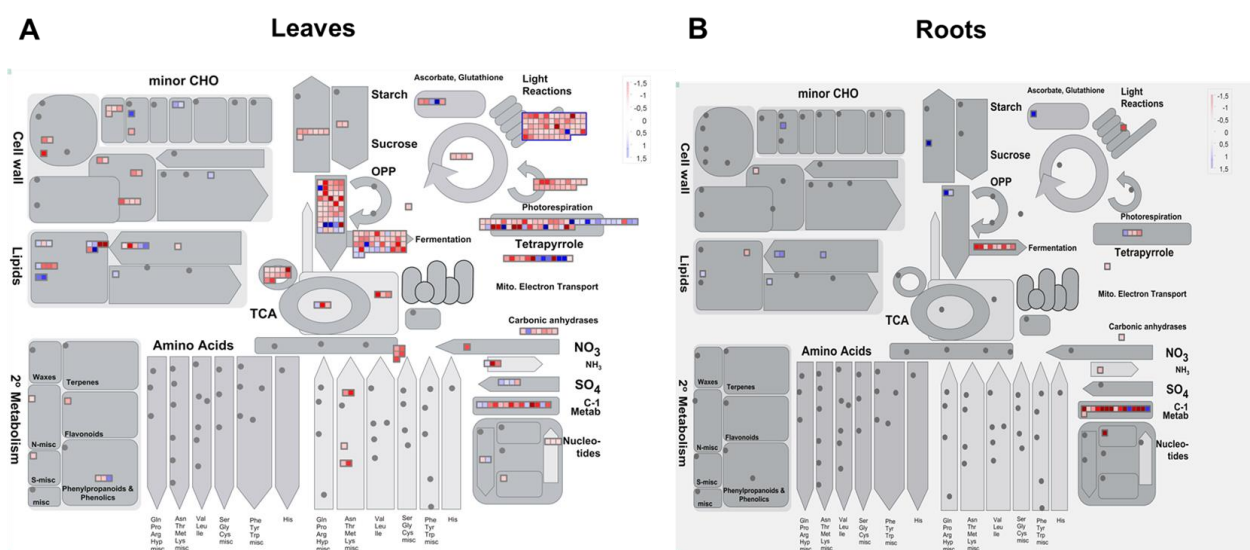

**Figure S6.** Metabolic gene expression changes under limiting N supply (4 mM N) analyzed by the MapMan tool (Schwacker et al., 2019). (A) Leaves. (B) Roots. Plants grown under 8 mM N conditions were used as controls.
