# Supplementary material for: Integrative Transcriptomic and Metabolomic Analysis at Organ Scale Reveals Gene Modules Involved in the Responses to Suboptimal Nitrogen Supply in Tomato
Source: MDPI journal article supplement (doi:10.3390/agronomy11071320), 2021-06-29
Supplement: s1 [file s1]

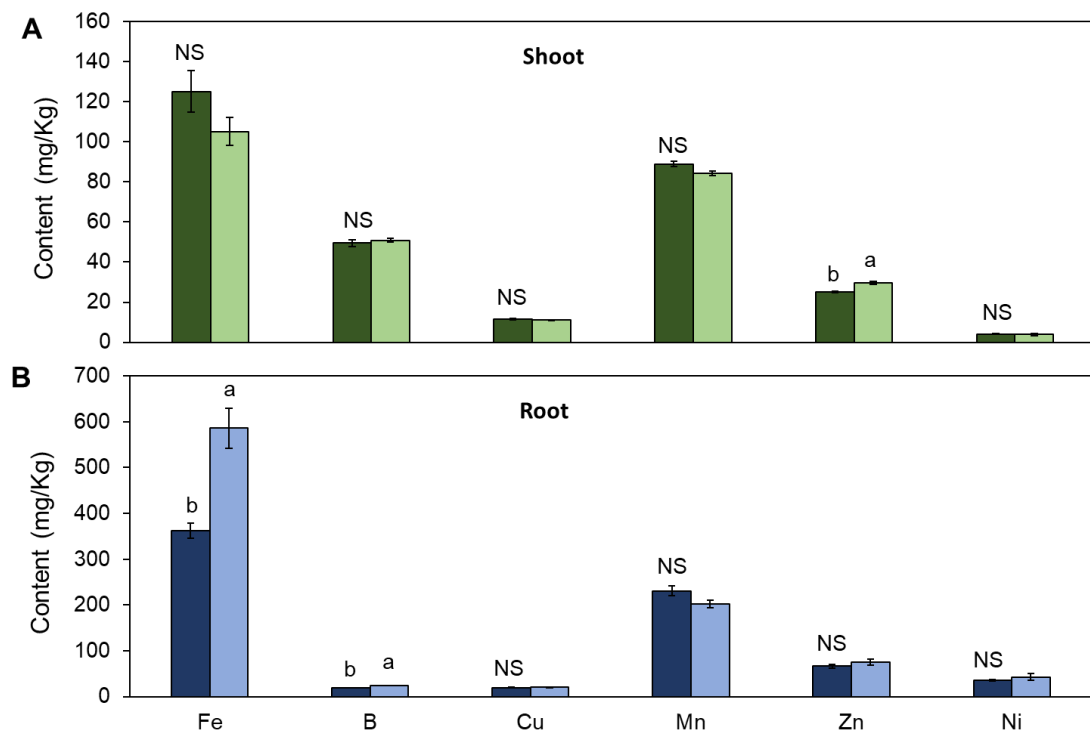

**Figure S2.** Effect of nitrogen supply levels on the uptake of micronutrients. Concentration (mg/kg) of Fe, B, Cu, Mn, Zn and Ni in leaves (A) and roots (B) of plants grown at 8 (dark colored bars) and 4 (light colored bars) mM N for 20 days. Values are means ( $\pm$ SE) of 4 independent determinations in different biological replicates. For each nutrient, different letters indicate significant differences ( $P < 0.05$ ).
