# Supplementary material for: Integrative Transcriptomic and Metabolomic Analysis at Organ Scale Reveals Gene Modules Involved in the Responses to Suboptimal Nitrogen Supply in Tomato
Source: MDPI journal article supplement (doi:10.3390/agronomy11071320), 2021-06-29
Supplement: s1 [file s1]

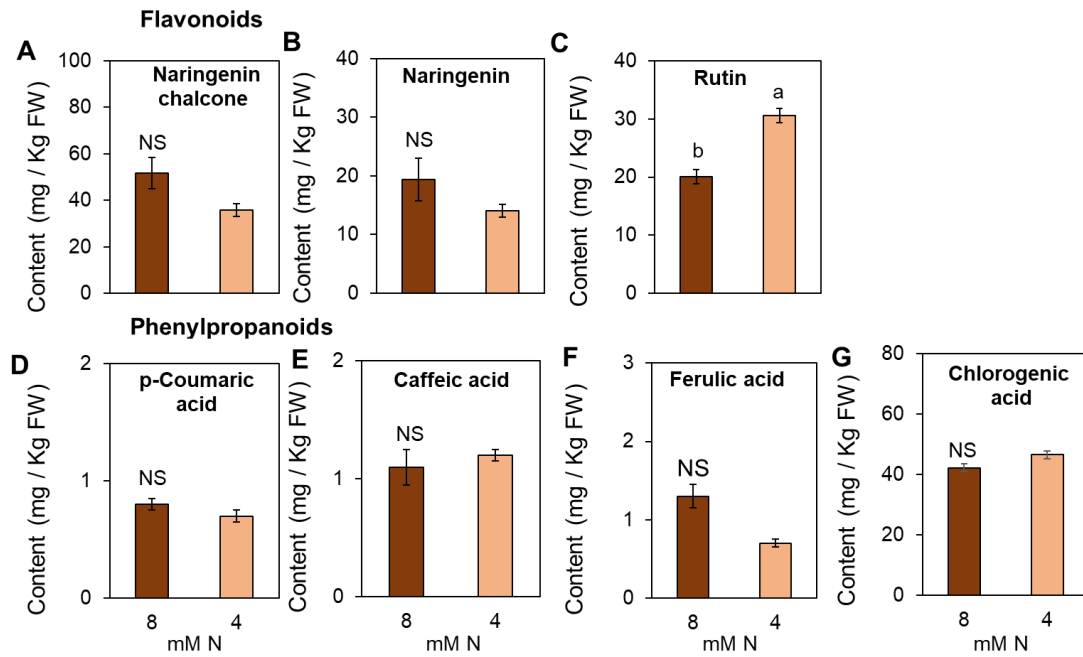

**Figure S7.** Effect of nitrogen supply levels on flavonoids and phenylpropanoids contents in mature red fruits in plants grown optimal (8 mM N, dark colored bars) and sub-optimal (4 mM N, light colored bars) conditions. Each value ( $\pm$ SE) is mean of three different determinations. Different letters indicate significant differences ( $P < 0.05$ ). NS: not significant
